# Supplementary material
Source: ML conference proceedings conference paper supplement (https://openaccess.thecvf.com/content/ICCV2021/html/Kim_Efficient_Action_Recognition_ICCV_2021_paper.html)
Supplement: Supplementary file 1 [file Kim_Efficient_Action_Recognition_ICCV_2021_supplemental.pdf]

# Efficient Action Recognition via Dynamic Knowledge Propagation -Supplementary Material-

Hanul Kim<sup>1,2</sup>, Mihir Jain<sup>1</sup>, Jun-Tae Lee<sup>1</sup>, Sungrack Yun<sup>1</sup>, Fatih Porikli<sup>1</sup>  
<sup>1</sup>Qualcomm AI Research\*

<sup>2</sup>Seoul National University of Science and Technology

hukim@seoultech.ac.kr, {mijain, juntlee, sungrack, fporikli}@qti.qualcomm.com

In this supplementary material, we first present an ablation study on the impact of different frame sampling strategies on the proposed approach. Finally, we show some additional qualitative results.

## S-1. Frame sampling strategies

We consider two strategies for frame sampling. First, as used in the main paper, we adapt sampling intervals  $r_s$  and  $r_t$  across videos in order to have the same  $n_s$  and  $n_t$  for all the videos. For this ‘adaptive’ strategy, we plot for  $n_s/n_t = 4$  as *Adaptive-4* (used in the main paper) and  $n_s/n_t = 8$  as *Adaptive-8*. The mAP-GFLOPs curves for our method are shown in Figure S-1. Second, we fix the sampling intervals  $r_s$  and  $r_t$  for all the videos, as a result  $n_s$  and  $n_t$  vary across videos and are proportional to the video-length. While  $n_s$  and  $n_t$  vary over videos, we set the ratio  $n_s/n_t$  as 4 and 8 to plot them as *Fixed-4* and *Fixed-8*, respectively.

As Figure S-1 illustrates, given enough sampled frames *i.e.* beyond 12 GFLOPs, all four plots of the two sampling strategies achieve similar and promising performances. However, Adaptive-4 and Adaptive-8 experience larger performance drop at lower GFLOPs. This is because, in this setup, only a few sampled frames  $n_t = 3$  are available per video, which leaves longer videos under-sampled. On the contrary, the fixed sampling interval strategy alleviates this problem by adjusting the number of sampled frames  $n_s$  and  $n_t$  according to the video-length, and achieves better mAP over lower computation range. Also, we see that Adaptive-8 and Fixed-8 perform a bit better than Adaptive-4 and Fixed-4 at the low GFLOPs setting, respectively. This shows more sampled frames for student is better in the low computation range.

Figure S-2 analyzes the impact of the number of sampled frames  $n_s$  and  $n_t$  by plotting mAP-GFLOPs curves. Specifically, *nt-5* sets  $n_t$  as 5 and varies  $n_s$  as {5, 20, 35, 50}. Similarly, *ns-20* sets  $n_s$  as 20 and varies  $n_t$  as {5, 10, 15, 20}.

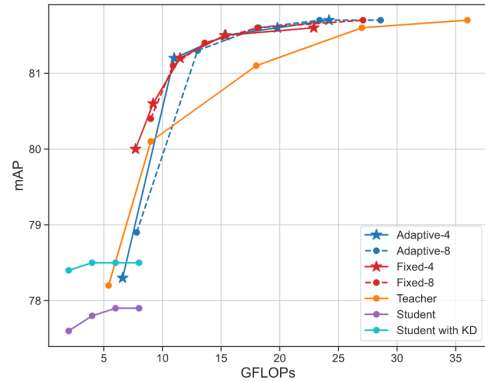

Figure S-1: Impact of Adaptive and Fixed sampling strategies (on ActivityNet 1.3): For both strategies, we set the ratio  $n_s/n_t$  to 4 and 8, and plot for accuracy vs. efficiency.

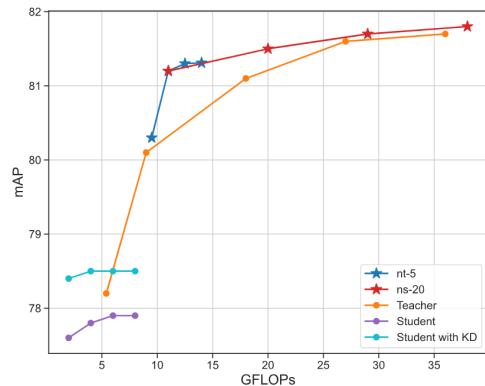

Figure S-2: Impact of number of samples frames on accuracy vs. efficiency plots on ActivityNet 1.3. We fix  $n_t = 5$  and vary  $n_s$  from 5 to 50 for ‘nt-5’. We set  $n_s = 20$  and vary  $n_t$  from 5 to 20 for ‘ns-20’. Naturally, we adopt the adaptive sampling intervals approach for both settings.

\*Qualcomm AI Research is an initiative of Qualcomm Technologies, Inc.

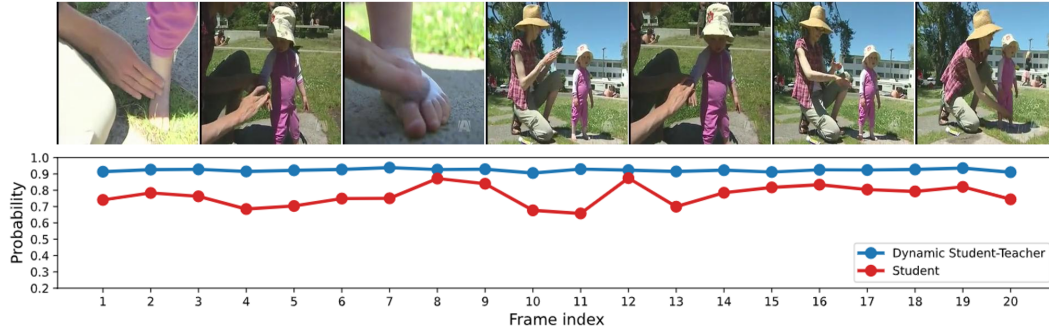

(a) Applying Sunscreen

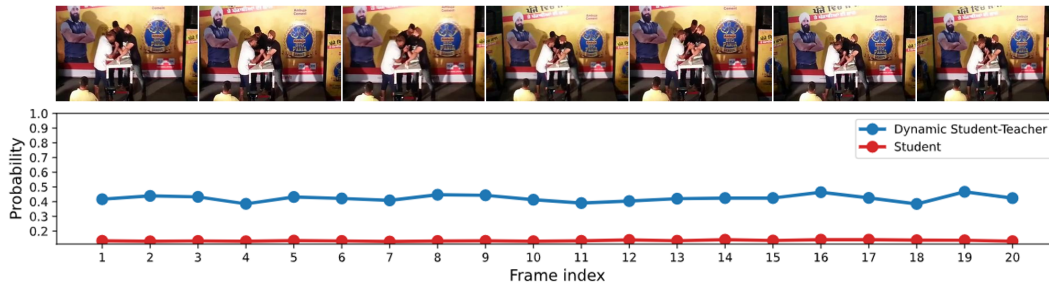

(b) Arm wrestling

Figure S-3: Action recognition on two videos: (a) Applying Sunscreen and (b) Arm wrestling. In both examples, the first row illustrates input frames, and the second row shows the sequence of probabilities for ground-truth class predicted by Student and Dynamic Student-Teacher Ensemble.

Both these settings outperform Teacher at lower computation range, showing valued utilization of the sampled frames for student by the proposed dynamic knowledge propagation. Though  $n_t$  needs to be increased to continue to improve mAP, as seen in case of *ns-20*, which goes on to better the Teacher even at higher GFLOPs.

## S-2. Additional Qualitative Results

Figure S-3 shows qualitative results and the frame-level probabilities indicating that a frame belongs to the ground-truth action class. The proposed method provides more accurate frame-level predictions through dynamic knowledge propagation to convey the teacher’s knowledge to the student during the inference time. Especially in Figure S-3 (b), the student network fails to yield accurate frame-level predictions. On the contrary, the proposed method provides relatively high probabilities for ground-truth class by exploiting more reliable information from the teacher network.
